# Supplementary material for: Oxo-bridged trinuclear and tetranuclear manganese complexes supported with nitrogen donor ligands: syntheses, structures and properties
Source: Royal Society of Chemistry journal article supplement (doi:10.1039/c9dt00966c), 2019-01-01
Supplement: c9dt00966c1.pdf [file c9dt00966c1.pdf]

## **Electronic Supporting Information**

**for the manuscript entitled**

### **Oxo-bridged Trinuclear and Tetranuclear Manganese Complexes Supported with Nitrogen Donor Ligands: Syntheses, Structures and Properties**

Deepak Bansal,<sup>1</sup> Abhishake Mondal,<sup>2</sup> N. Lakshminarasimhan<sup>3</sup> and Rajeev Gupta<sup>1,\*</sup>

<sup>1</sup>Department of Chemistry, University of Delhi, Delhi 110 007, India

<sup>2</sup>Solid State and Structural Chemistry Unit, Indian Institute of Science, Bangalore – 560 012, Karnataka, India

<sup>3</sup>Functional Materials Division, CSIR-Central Electrochemical Research Institute (CECRI) Karaikudi – 630 003, Tamil Nadu, India & Academy of Scientific and Innovative Research, CSIR-CECRI Campus, Karaikudi – 630 003, Tamil Nadu, India

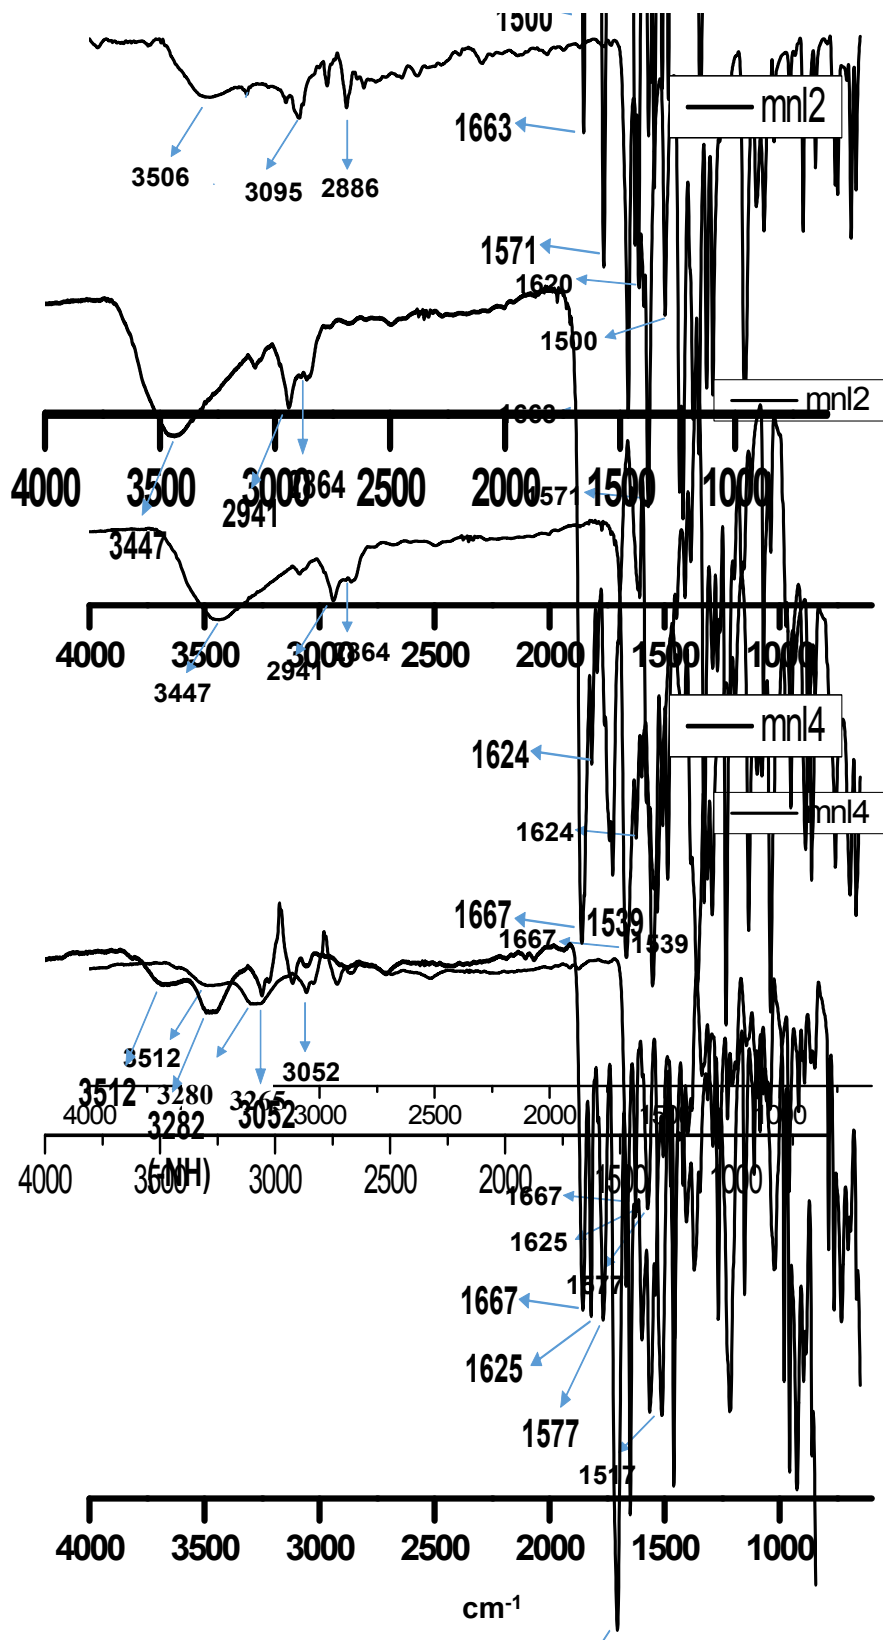

Figure S1. FTIR spectra of complexes 1–3.

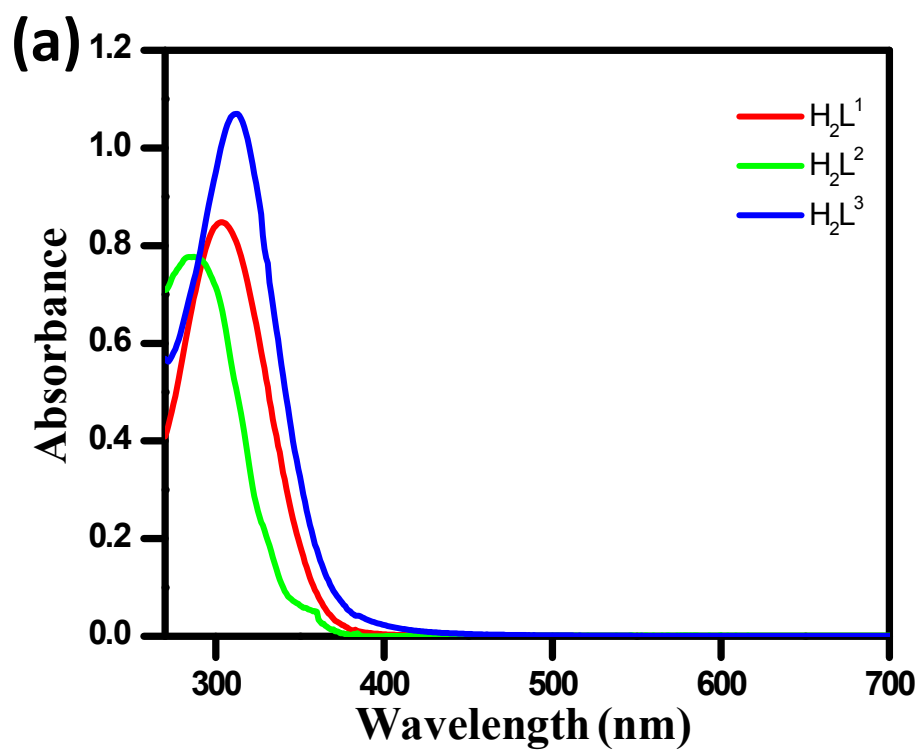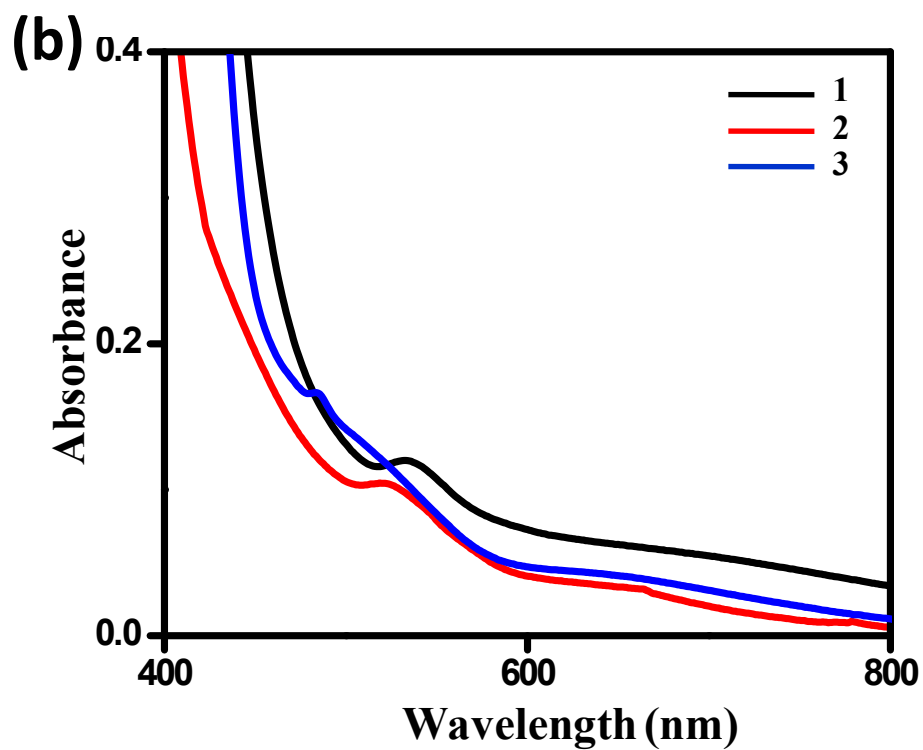

**Figure S2.** Absorption spectra of (a) ligands  $H_2L^1$ - $H_2L^3$  and (b) complexes 1-3.

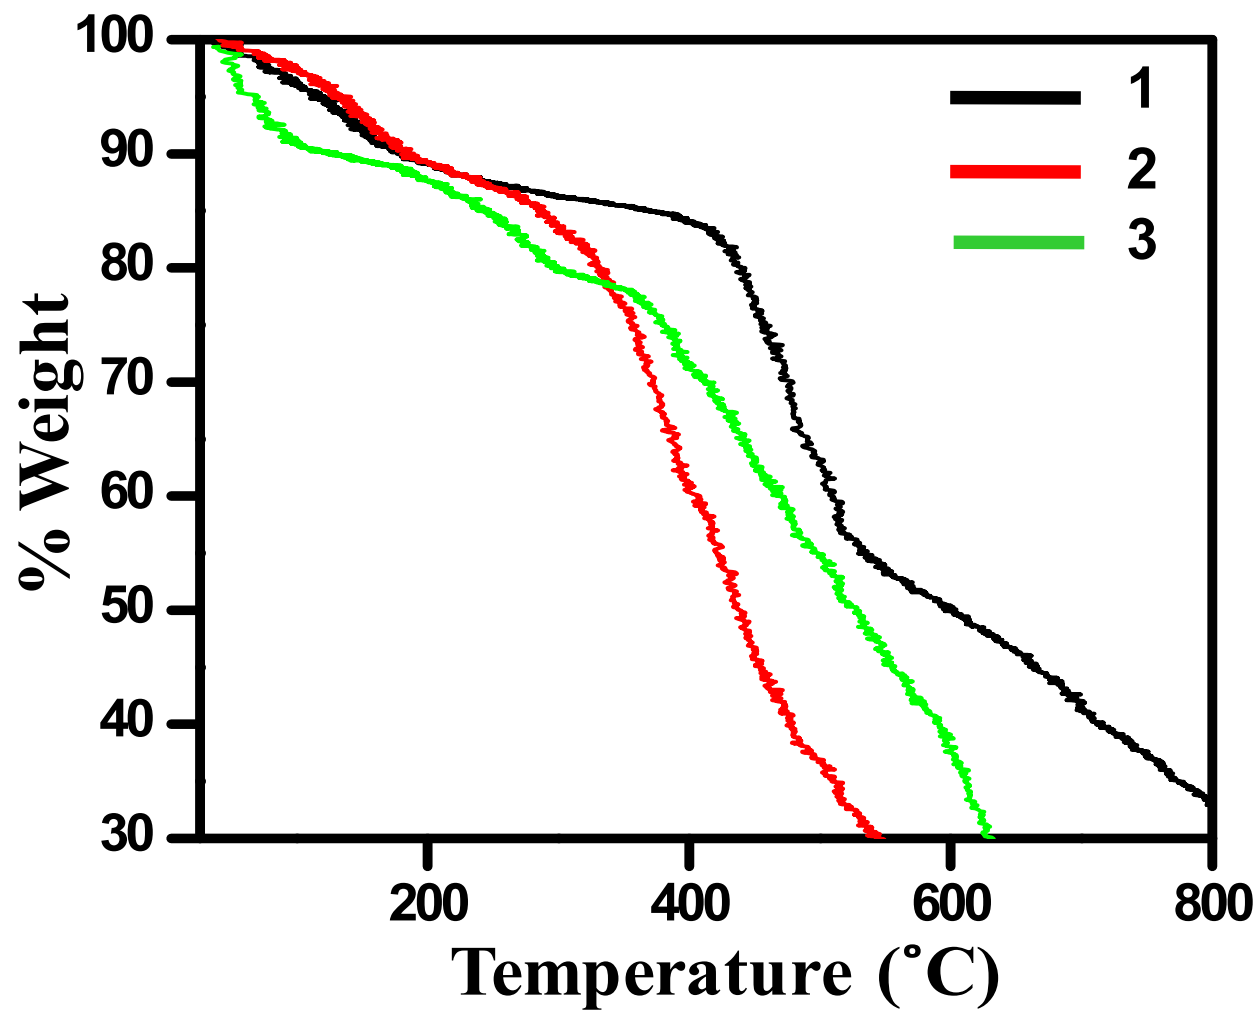

Figure S3. Thermogravimetric analysis (TGA) plots for complexes 1–3.

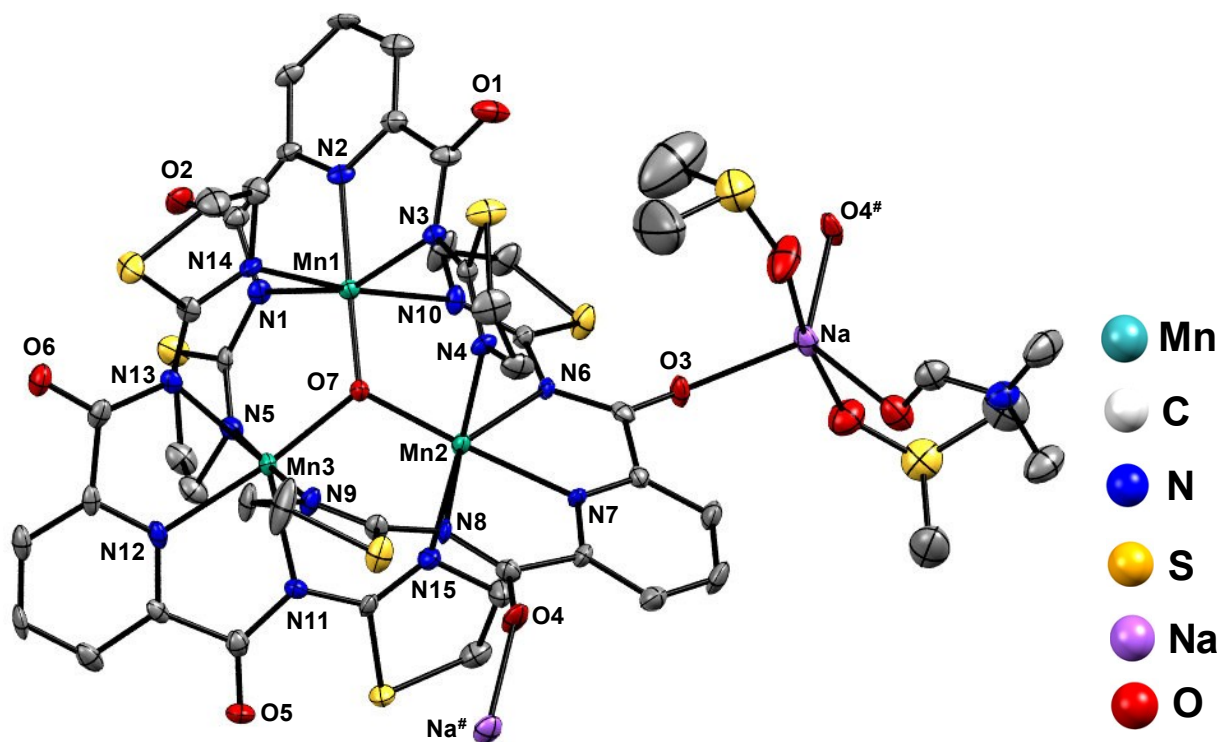

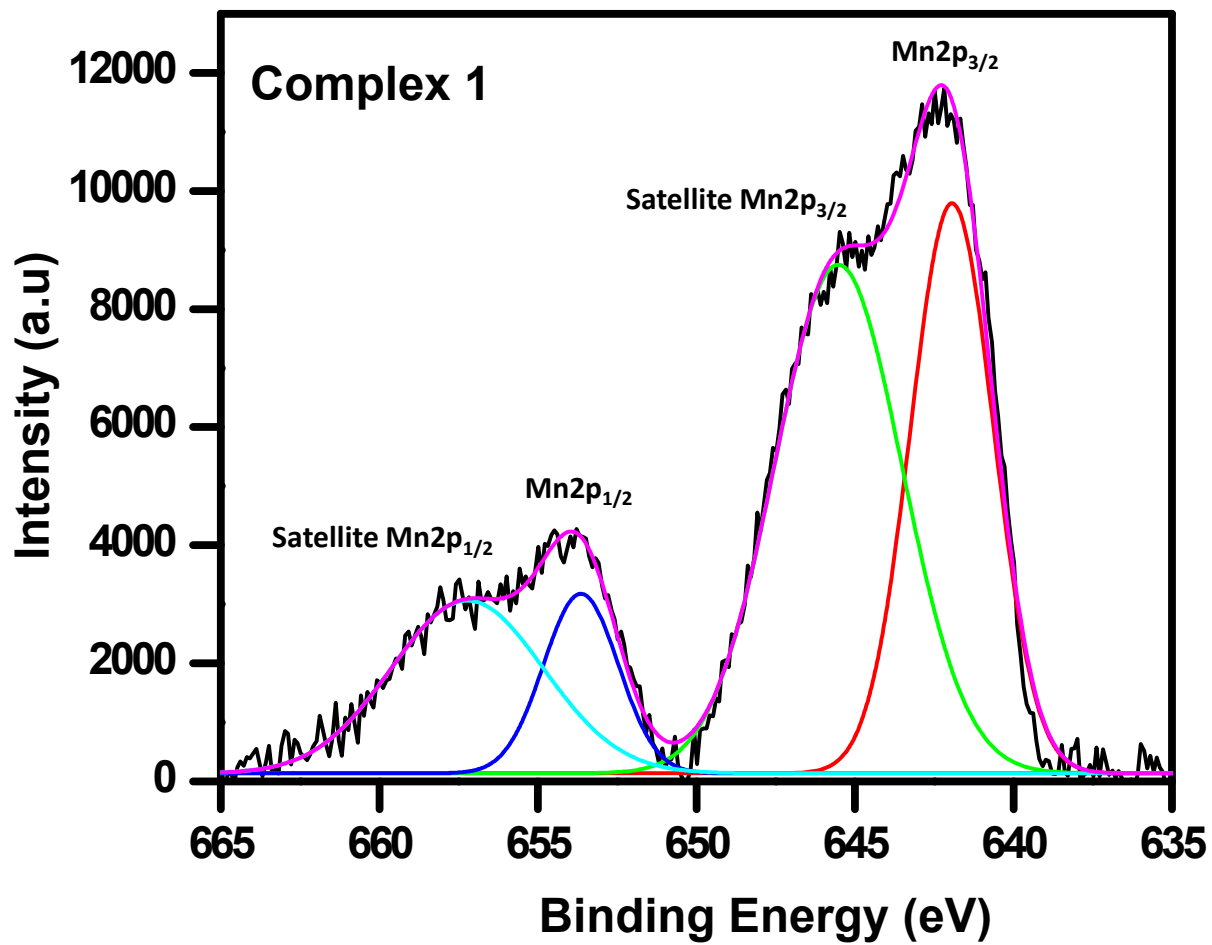

Figure S5. De-convoluted Mn2p XPS spectrum of complex 1.

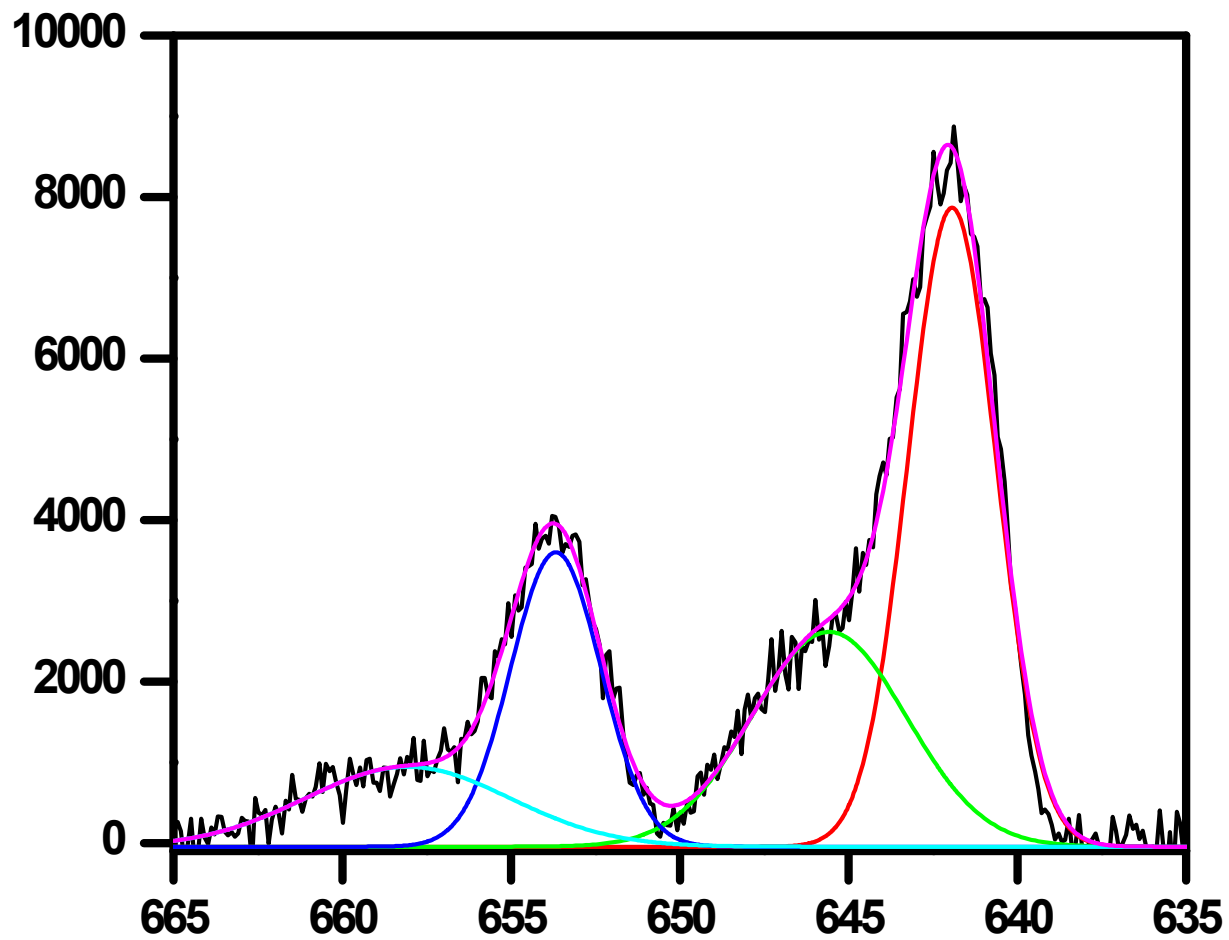

Figure S6. De-convoluted Mn2p XPS spectrum of complex 2.

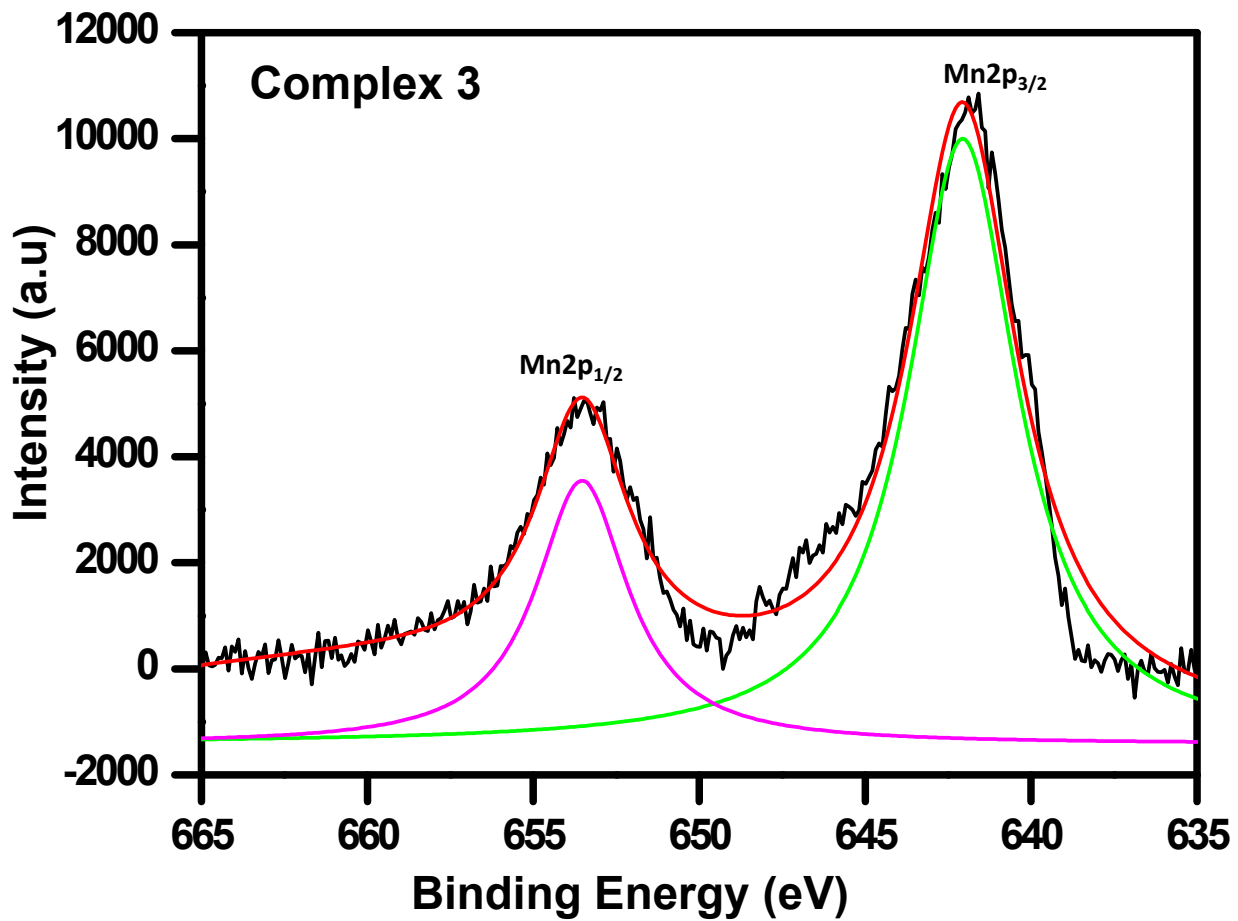

Figure S7. De-convoluted Mn2p XPS spectrum of complex 3.



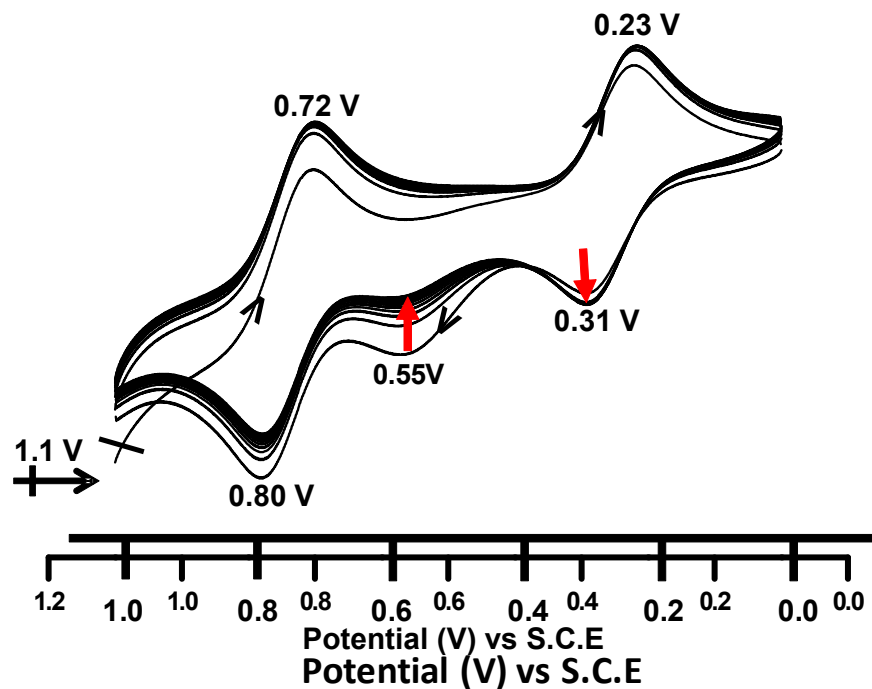

**Figure S8.** Cyclic voltammetric traces for complex **1** displaying disappearance of an electrochemical response at ca. 0.58 V on multiple scans.

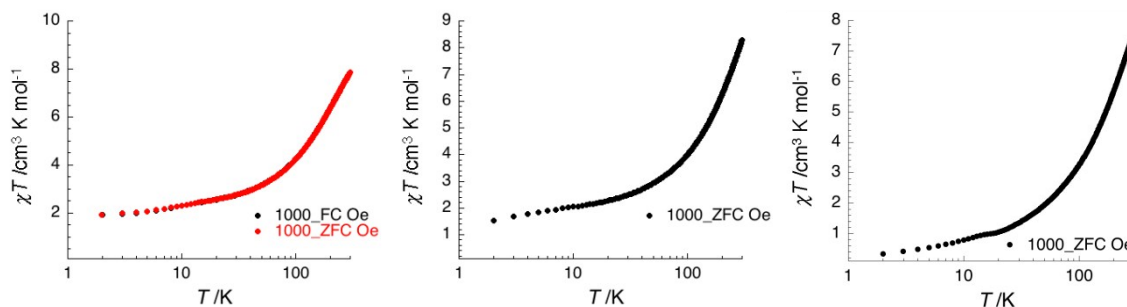

**Figure S9.** Temperature dependence of  $\chi T$  product (log scale) at 1000 Oe for polycrystalline samples for complexes **1** (left), **2** (middle) and **3** (right).

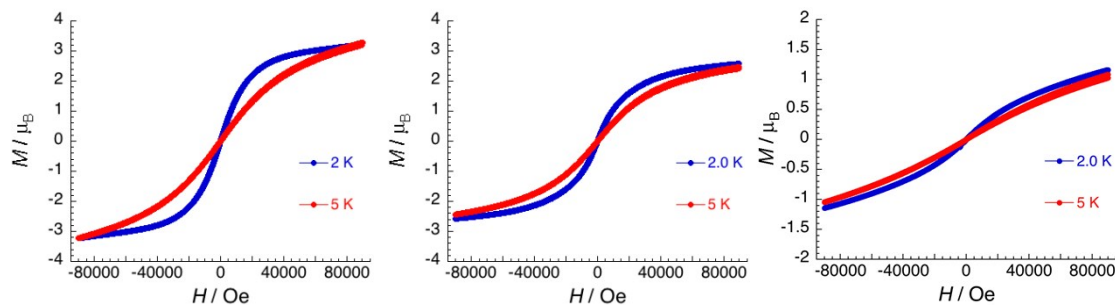

**Figure S10.** Field dependence of the magnetization as  $M$  vs  $H$  plots for complexes **1** (left), **2** (middle) and **3** (right) at 2 and 5 K, respectively.

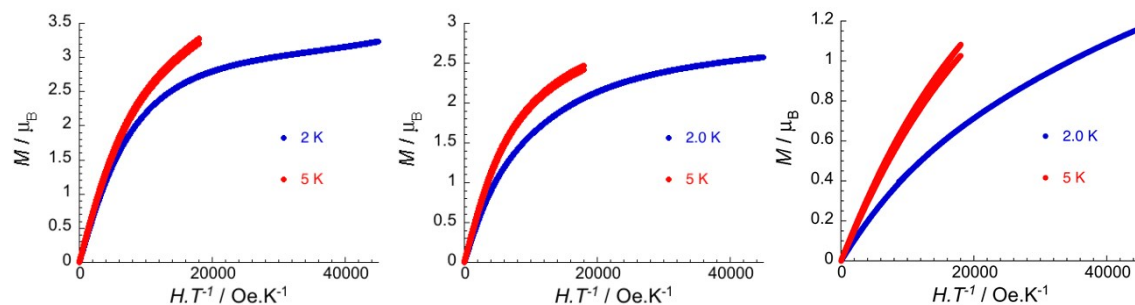

**Figure S11.** Field dependence of the magnetization as  $M$  vs  $H/T$  plots for complexes **1** (left), **2** (middle) and **3** (right) at 2 and 5 K, respectively.

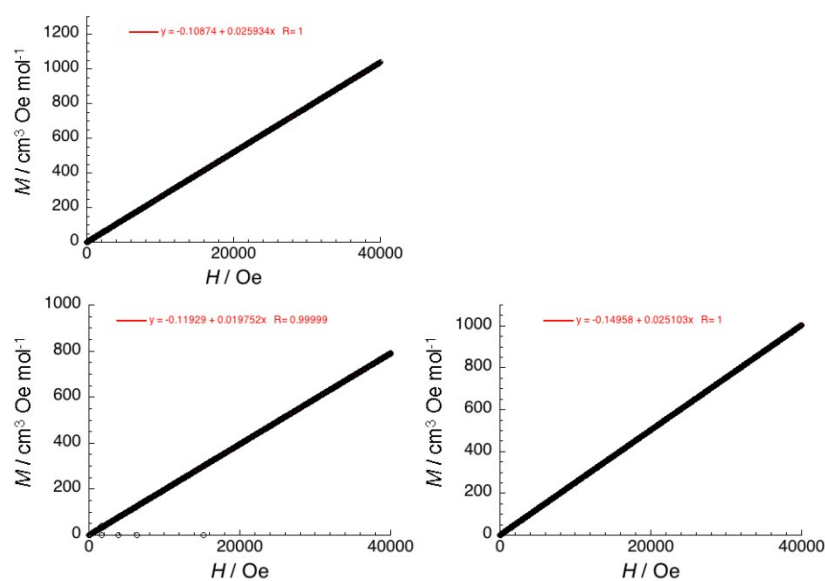

**Figure S12.** Field dependence of the magnetization for complexes **1** (left), **2** (middle) and **3** (right) collected at 300 K. The red line represents the linear fit to the data.

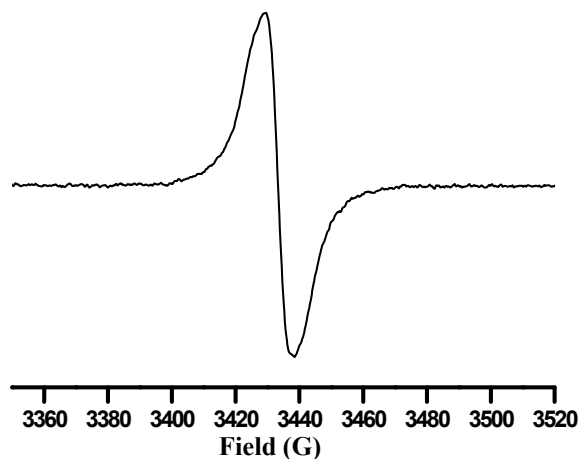

**Figure S13.** Solid-state EPR spectrum of polycrystalline sample of complex **1** recorded at 77K.

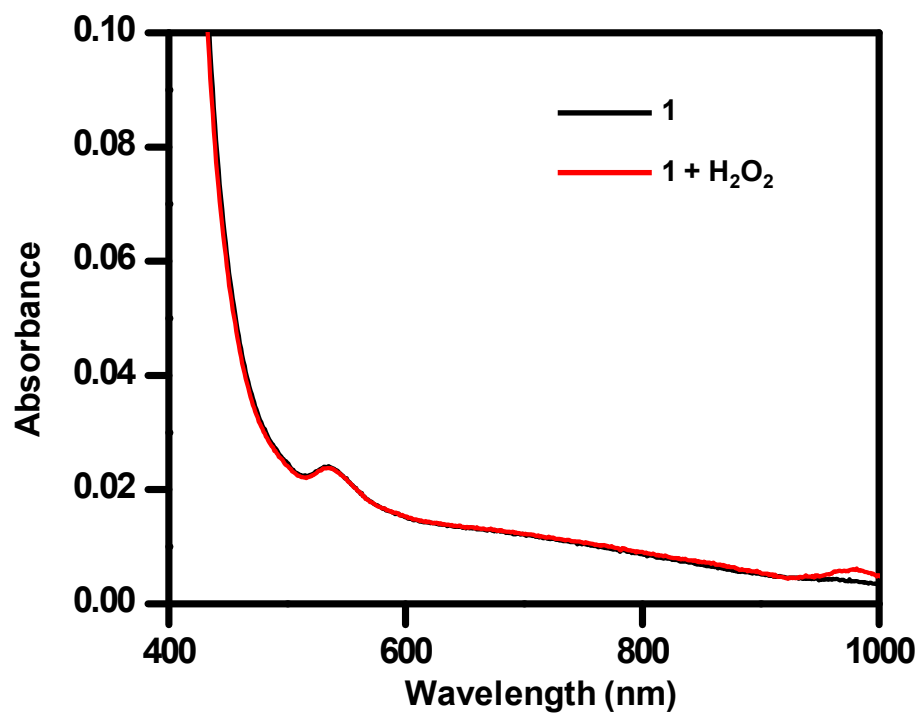

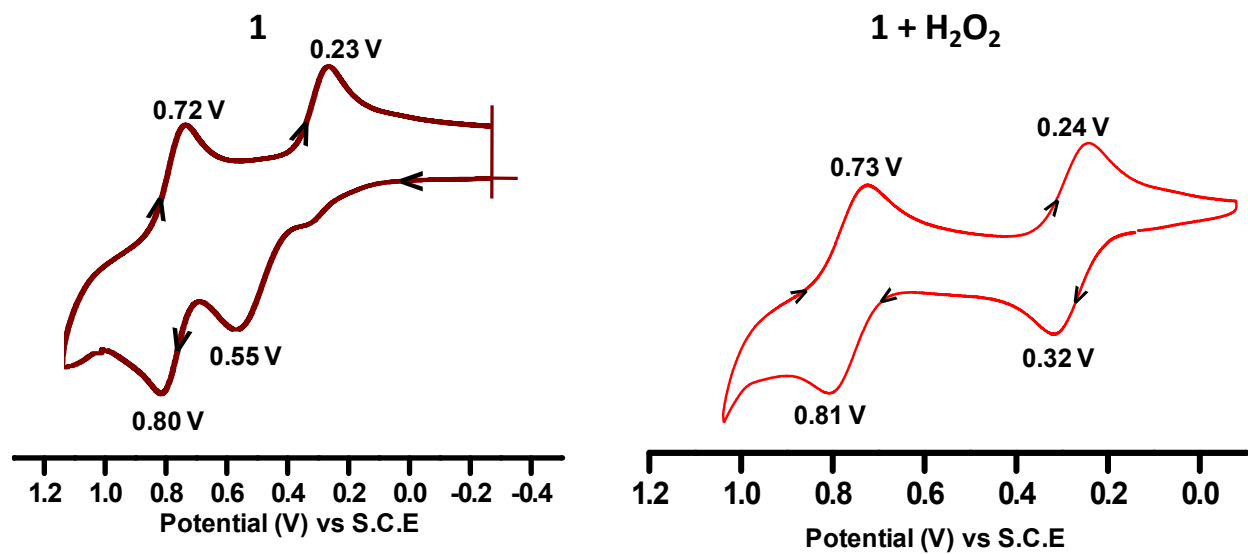

**Figure S14.** Changes in the absorption spectra (top) and cyclic voltammograms (bottom) of complex **1** on addition of 150 equiv. of  $\text{H}_2\text{O}_2$ .

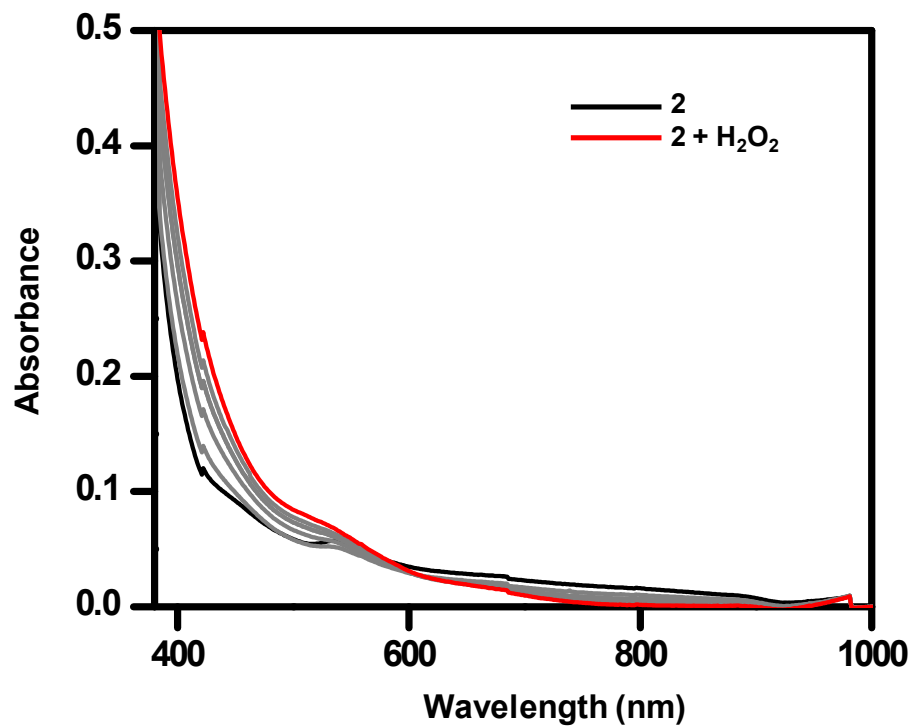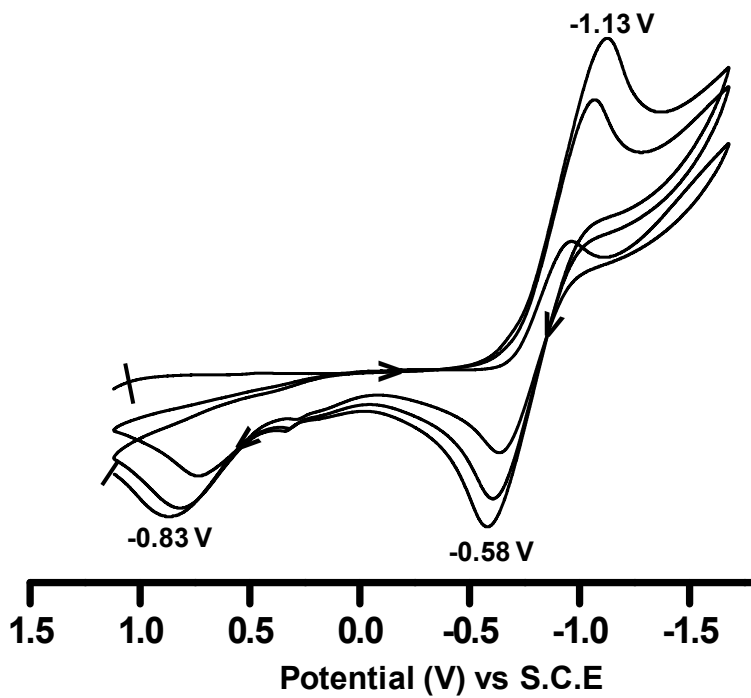

**Figure S15.** Changes in the absorption spectra (top) and cyclic voltammograms (bottom) of complex **2** on addition of 150 equiv. of H<sub>2</sub>O<sub>2</sub>.

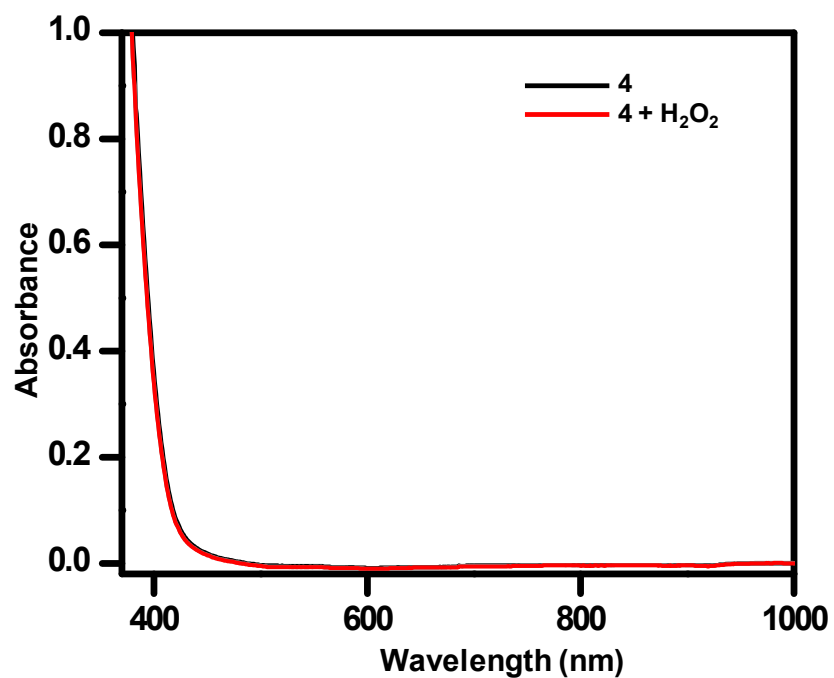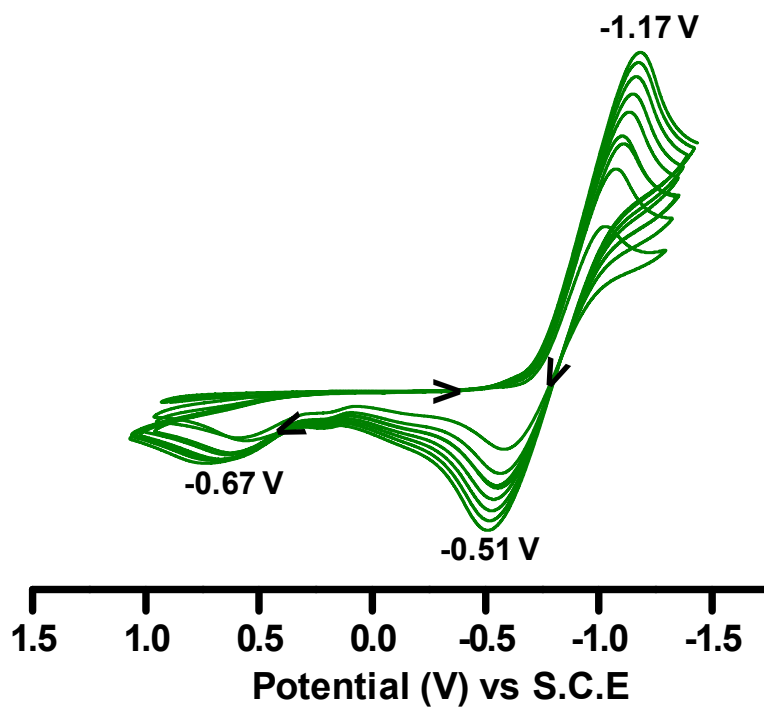

**Figure S16.** Changes in the absorption spectra (top) and cyclic voltammograms (bottom) of complex 3 on addition of 150 equiv. of H<sub>2</sub>O<sub>2</sub>.

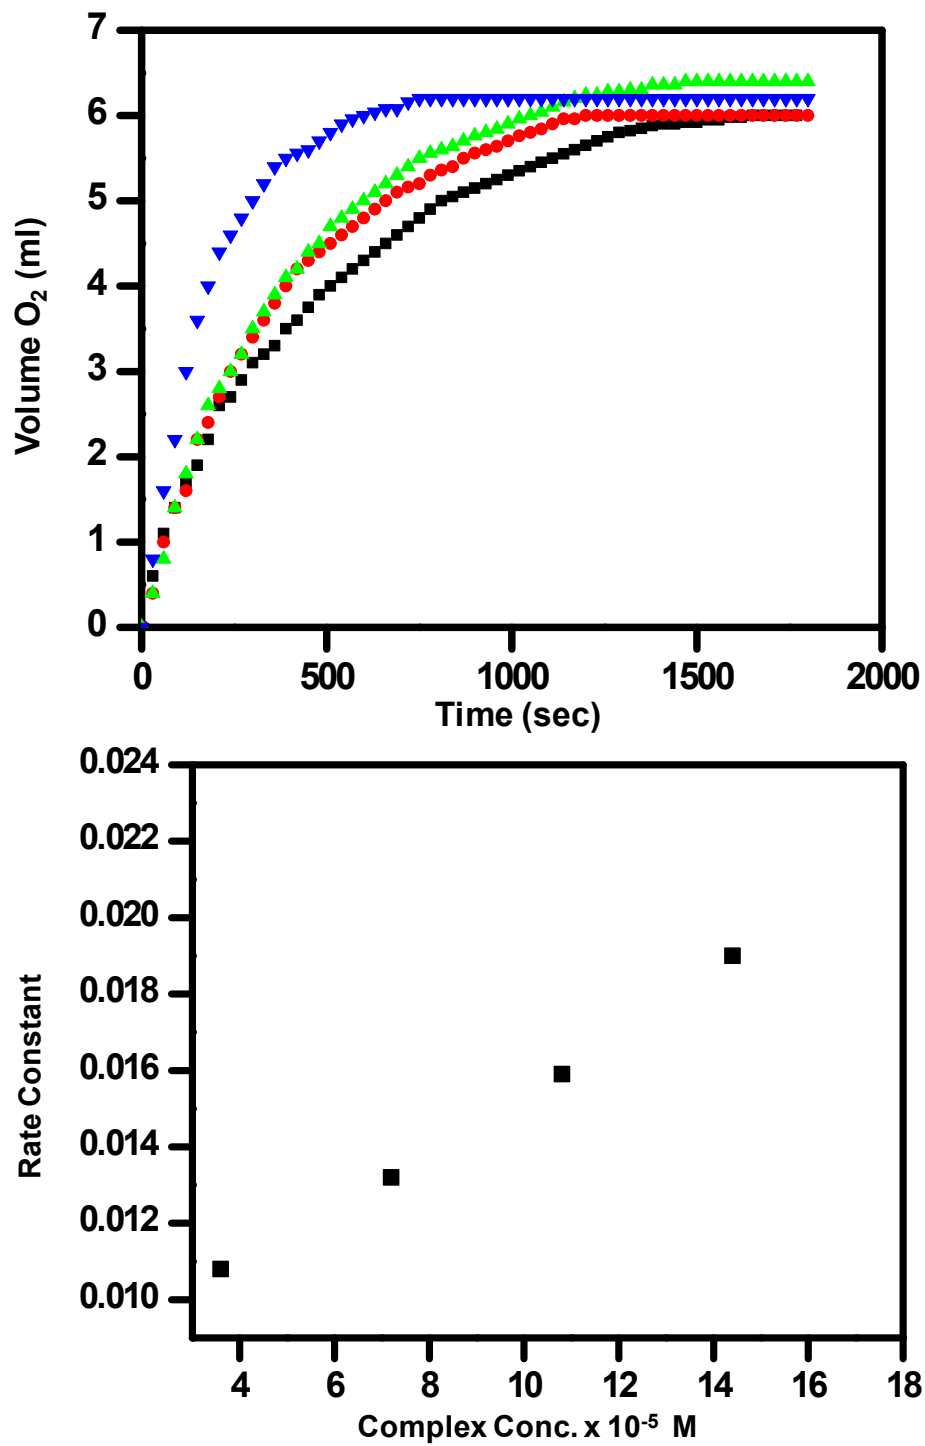

**Figure S17.** Top: Change in the volume of evolved O<sub>2</sub> with different concentration of complex 2 keeping constant [H<sub>2</sub>O<sub>2</sub>]. Bottom: rate change in O<sub>2</sub> evolution as a function of complex concentration.

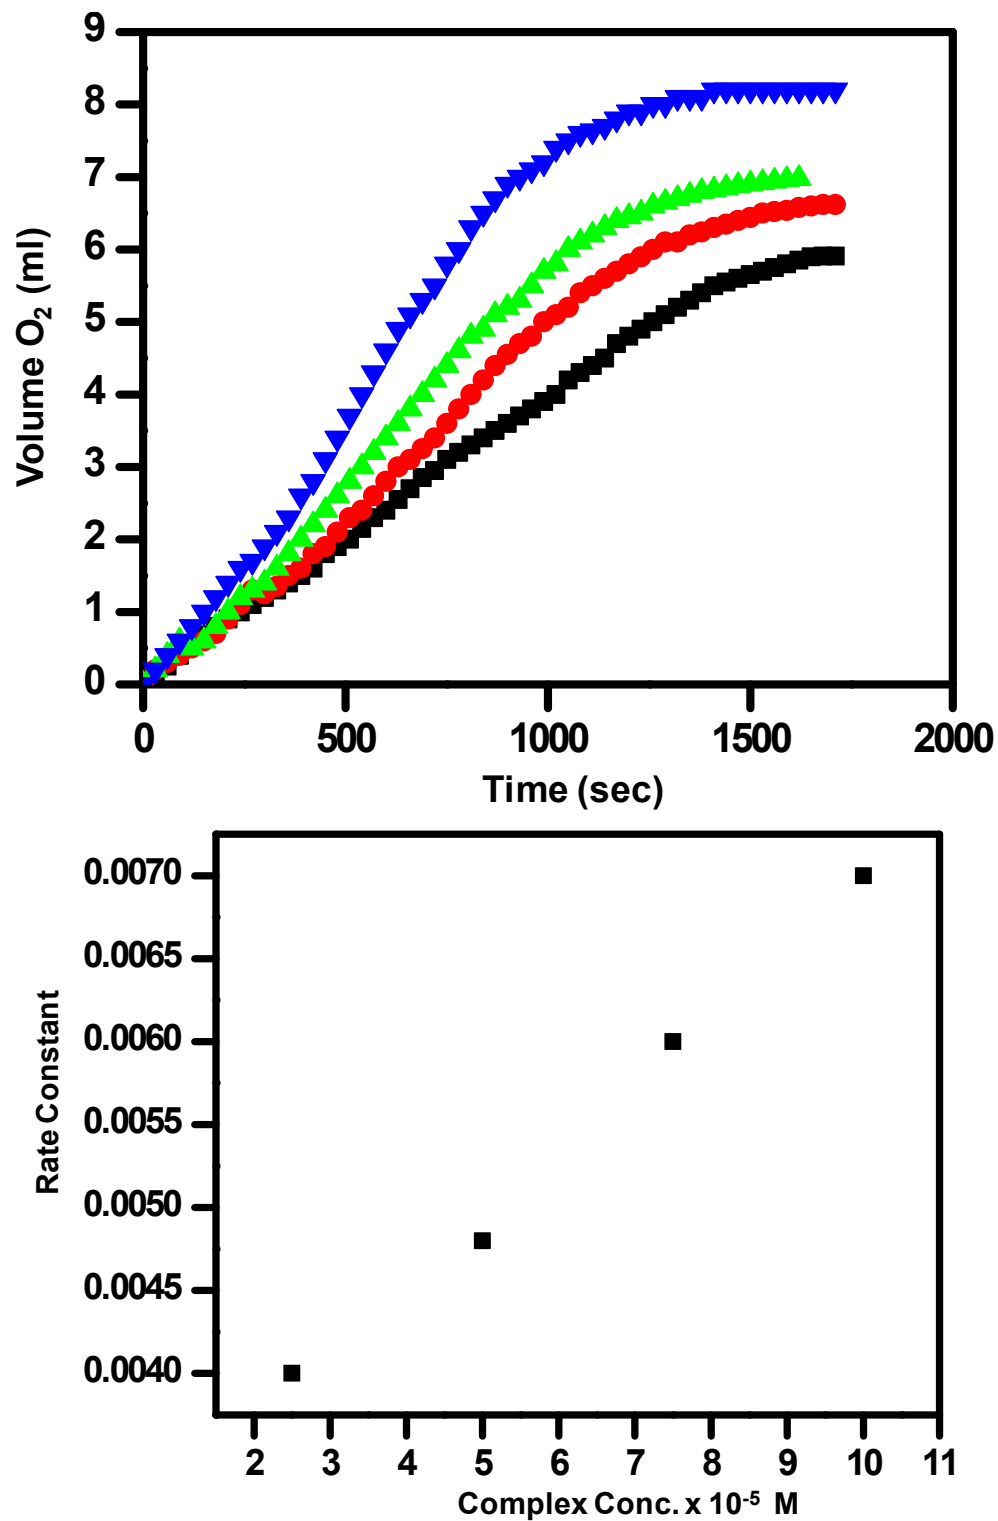

**Figure S18.** Top: Change in the volume of evolved O<sub>2</sub> with different concentration of complex 3 keeping constant [H<sub>2</sub>O<sub>2</sub>]. Bottom: rate change in O<sub>2</sub> evolution as a function of complex concentration.



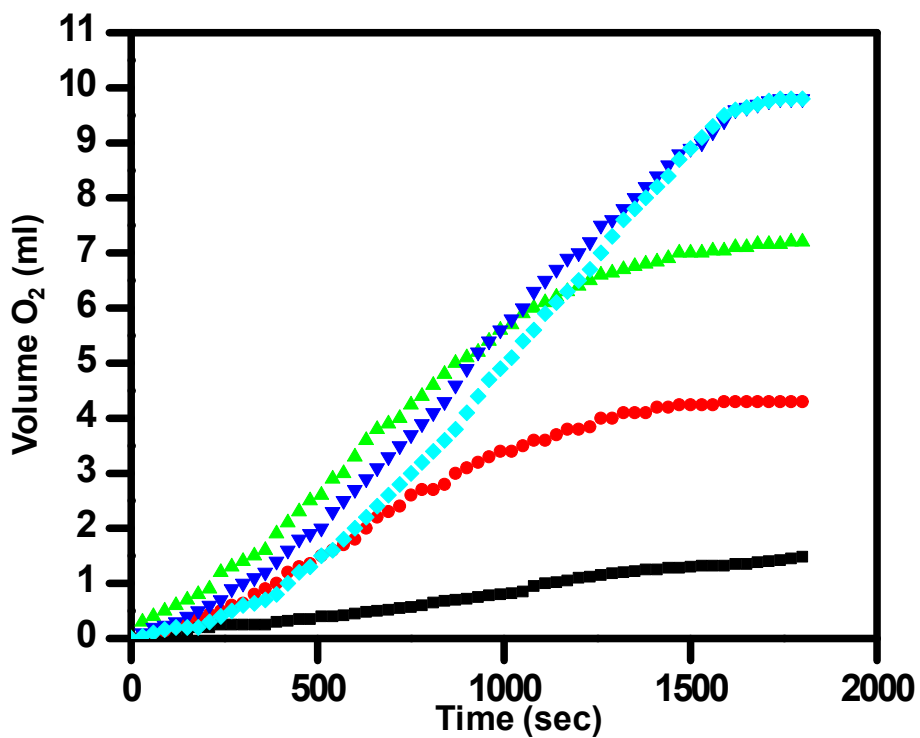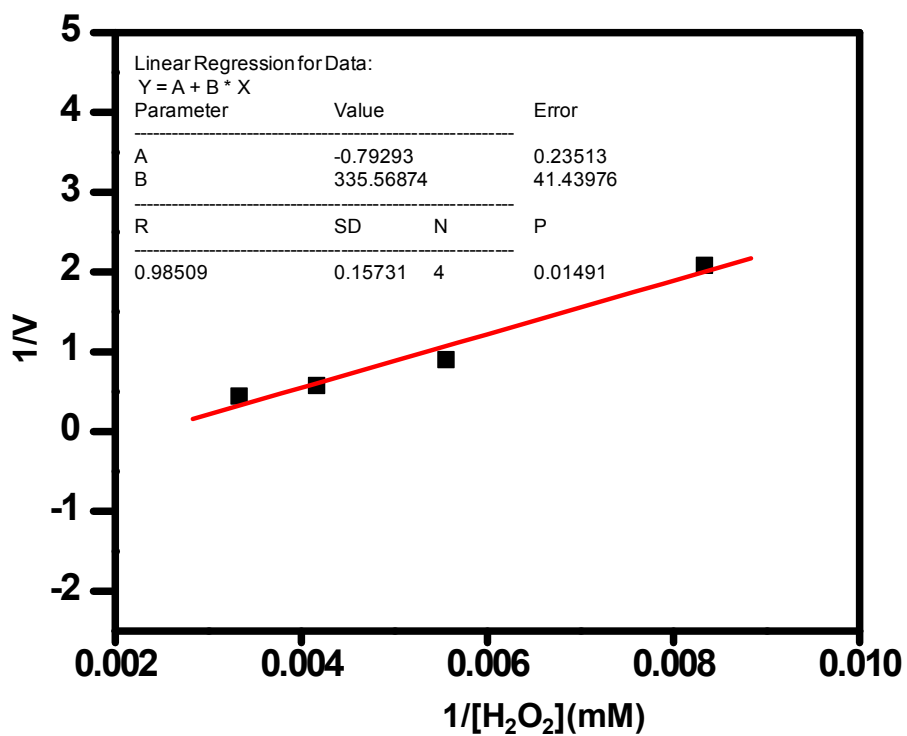

**Figure S19.** Top: Time-dependent evolution of O<sub>2</sub> after successive additions of H<sub>2</sub>O<sub>2</sub> (150-750 equiv.) to a solution of complex **2**. Bottom: Lineweaver–Burk plot between 1/V and 1/[H<sub>2</sub>O<sub>2</sub>].

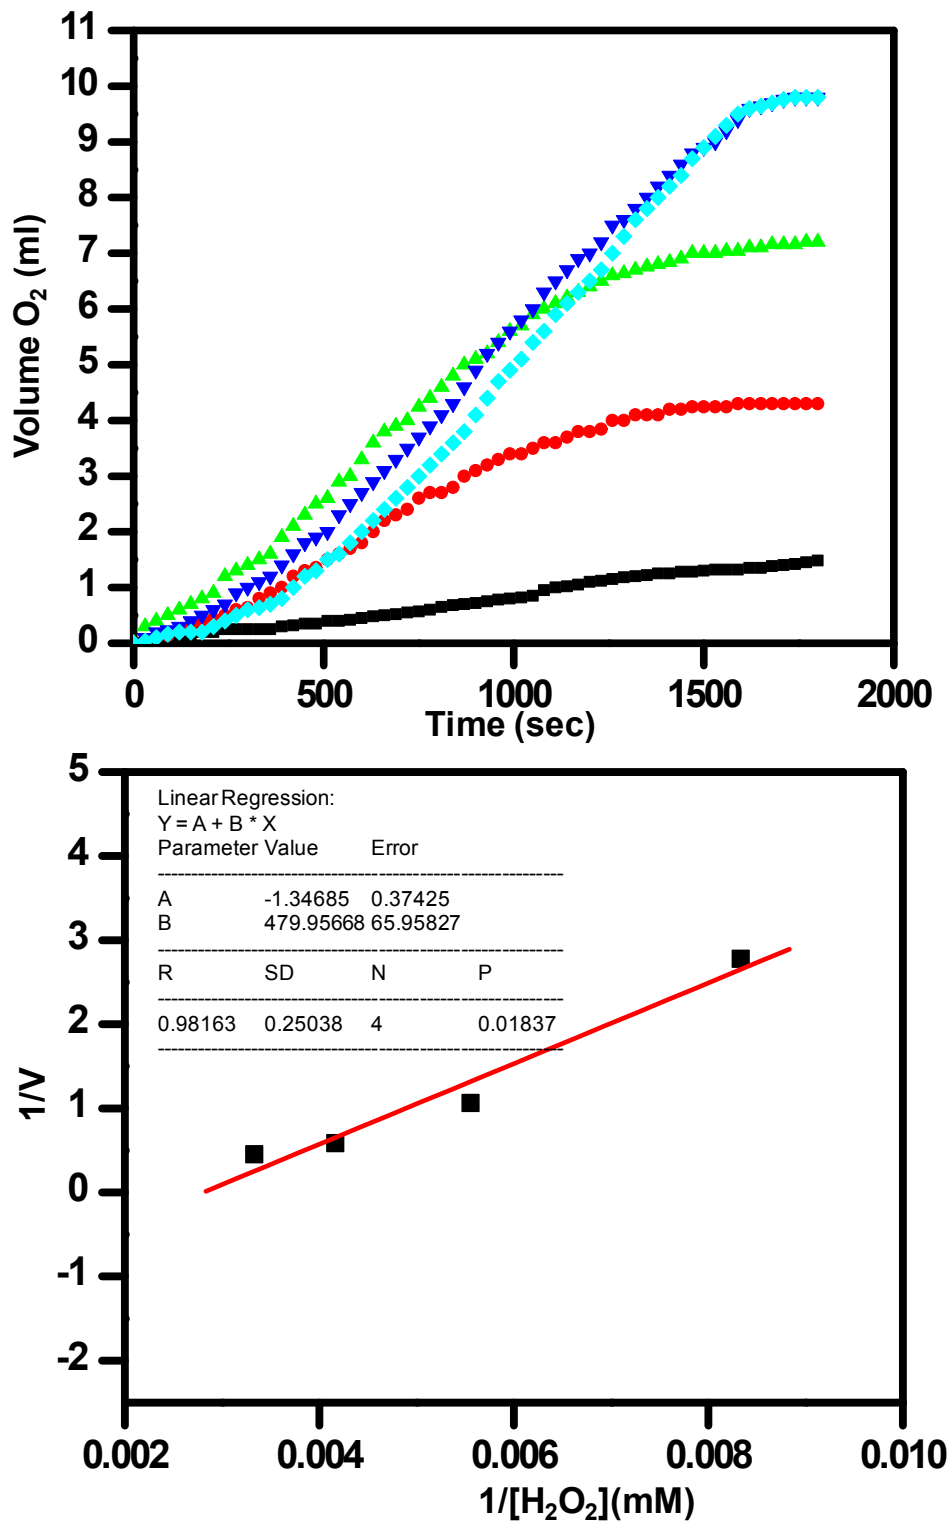

**Figure S20.** Top: Time-dependent evolution of O<sub>2</sub> after successive additions of H<sub>2</sub>O<sub>2</sub> (150-750 equiv.) to a solution of complex **2**. Bottom: Lineweaver–Burk plot between 1/V and 1/[H<sub>2</sub>O<sub>2</sub>].

**Table S1.** Crystallographic data collection and structure refinement parameters for complexes **1–3**.

|                                                                             | <b>1</b>                                                                                      | <b>2</b>                                                                                         | <b>3</b>                                                                        |
|-----------------------------------------------------------------------------|-----------------------------------------------------------------------------------------------|--------------------------------------------------------------------------------------------------|---------------------------------------------------------------------------------|
| Empirical formula                                                           | C <sub>39</sub> H <sub>21</sub> Mn <sub>3</sub> N <sub>15</sub> O <sub>7</sub> S <sub>6</sub> | C <sub>48</sub> H <sub>58</sub> Mn <sub>3</sub> N <sub>16</sub> NaO <sub>11</sub> S <sub>9</sub> | C <sub>76</sub> H <sub>71</sub> Mn <sub>4</sub> N <sub>25</sub> O <sub>12</sub> |
| formula mass                                                                | 1168.89                                                                                       | 1511.45                                                                                          | 1746.33                                                                         |
| T [K]                                                                       | 293(2)                                                                                        | 293(2)                                                                                           | 293(2)                                                                          |
| Crystal system                                                              | Triclinic                                                                                     | Orthorhombic                                                                                     | Monoclinic                                                                      |
| Space group                                                                 | <i>P</i> -1                                                                                   | <i>Pbcn</i>                                                                                      | <i>P</i> 2 <sub>1</sub> / <i>c</i>                                              |
| <i>a</i> [Å]                                                                | 9.3373(5)                                                                                     | 34.750 (2)                                                                                       | 13.0764(2)                                                                      |
| <i>b</i> [Å]                                                                | 14.7042(7)                                                                                    | 17.5751 (7)                                                                                      | 25.6016(5)                                                                      |
| <i>c</i> [Å]                                                                | 24.1731(12)                                                                                   | 20.5572 (11)                                                                                     | 24.1881(4)                                                                      |
| $\alpha$ [°]                                                                | 95.157(4)                                                                                     | 90                                                                                               | 90                                                                              |
| $\beta$ [°]                                                                 | 91.831(4)                                                                                     | 90                                                                                               | 93.0681(18)                                                                     |
| $\gamma$ [°]                                                                | 100.293(4)                                                                                    | 90                                                                                               | 90                                                                              |
| <i>V</i> [Å <sup>3</sup> ]                                                  | 3248.4(3)                                                                                     | 12555.0 (11)                                                                                     | 8086.0 (3)                                                                      |
| <i>Z</i>                                                                    | 2                                                                                             | 8                                                                                                | 4                                                                               |
| <i>d</i> [g cm <sup>-3</sup> ]                                              | 1.195                                                                                         | 1.599                                                                                            | 1.434                                                                           |
| $\mu$ [mm <sup>-1</sup> ]                                                   | 0.815                                                                                         | 0.970                                                                                            | 0.687                                                                           |
| <i>F</i> (000)                                                              | 1174                                                                                          | 6208                                                                                             | 3592                                                                            |
| Final <i>R</i> indices<br>[ <i>I</i> >2 $\sigma$ ( <i>I</i> )] <sup>a</sup> | <i>R</i> <sub>1</sub> = 0.0981<br><i>wR</i> <sub>2</sub> = 0.2081                             | <i>R</i> <sub>1</sub> = 0.1043<br><i>wR</i> <sub>2</sub> = 0.2010                                | <i>R</i> <sub>1</sub> = 0.0710<br><i>wR</i> <sub>2</sub> = 0.1846               |
| <i>R</i> indices (all<br>data)                                              | <i>R</i> <sub>1</sub> = 0.1622<br><i>wR</i> <sub>2</sub> = 0.2357                             | <i>R</i> <sub>1</sub> = 0.1535<br><i>wR</i> <sub>2</sub> = 0.2236                                | <i>R</i> <sub>1</sub> = 0.1148<br><i>wR</i> <sub>2</sub> = 0.2089               |
| GOF ( <i>F</i> <sup>2</sup> )                                               | 1.023                                                                                         | 1.094                                                                                            | 1.030                                                                           |
| CCDC                                                                        | 1900796                                                                                       | 1900797                                                                                          | 1900798                                                                         |

<sup>a</sup>  $R_1 = \Sigma||F_o| - |F_c|| / \Sigma|F_o|$ ;  $wR = \{[\Sigma(|F_o|^2|F_c|^2)^2]\}^{1/2}$

Table S2. Selected bond distances (Å) and bond angles (°) for complexes **1–3**.

| Atoms                  | <b>1</b> | Atoms            | <b>2</b> | Atoms            | <b>3</b>   |
|------------------------|----------|------------------|----------|------------------|------------|
| Mn(1)-O(7)             | 2.001(5) | Mn(1)-O(7)       | 1.744(5) | N(1)-Mn(1)       | 2.273(4)   |
| Mn(1)-N(2)             | 2.167(5) | Mn(1)-N(2)       | 1.999(7) | N(2)-Mn(1)       | 2.196(4)   |
| Mn(1)-N(3)             | 2.200(6) | Mn(1)-N(3)       | 2.124(7) | N(3)-Mn(1)       | 2.251(4)   |
| Mn(1)-N(1)             | 2.252(6) | Mn(1)-N(1)       | 2.126(7) | N(4)-Mn(4)       | 2.188(4)   |
| Mn(1)-N(10)            | 2.348(6) | Mn(1)-N(14)      | 2.357(7) | N(5)-Mn(3)       | 2.176(4)   |
| Mn(1)-N(15)            | 2.460(7) | Mn(1)-N(10)      | 2.408(7) | N(6)-Mn(2)       | 2.259(4)   |
| Mn(2)-O(7)             | 1.909(6) | Mn(2)-O(7)       | 1.963(5) | N(7)-Mn(2)       | 2.159(4)   |
| Mn(2)-N(7)             | 2.131(6) | Mn(2)-N(7)       | 2.167(6) | N(8)-Mn(2)       | 2.307(4)   |
| Mn(2)-N(8)             | 2.216(6) | Mn(2)-N(8)       | 2.243(7) | N(9)-Mn(4)       | 2.153(4)   |
| Mn(2)-N(6)             | 2.228(5) | Mn(2)-N(6)       | 2.272(6) | N(10)-Mn(1)      | 2.164(4)   |
| Mn(2)-N(4)             | 2.434(7) | Mn(2)-N(4)       | 2.370(7) | N(11)-Mn(3)      | 2.281(4)   |
| Mn(2)-N(14)            | 2.469(6) | Mn(2)-N(15)      | 2.429(7) | N(12)-Mn(3)      | 2.177(4)   |
| Mn(3)-O(7)             | 1.934(5) | Mn(3)-O(7)       | 1.978(5) | N(13)-Mn(3)      | 2.267(4)   |
| Mn(3)-N(12)            | 2.135(6) | Mn(3)-N(12)      | 2.184(7) | N(14)-Mn(4)      | 2.168(4)   |
| Mn(3)-N(13)            | 2.228(6) | Mn(3)-N(11)      | 2.244(7) | N(15)-Mn(2)      | 2.185(4)   |
| Mn(3)-N(11)            | 2.231(6) | Mn(3)-N(13)      | 2.277(7) | O(7)-Mn(2)       | 2.007(3)   |
| Mn(3)-N(9)             | 2.312(7) | Mn(3)-N(5)       | 2.352(7) | O(7)-Mn(3)       | 2.006(3)   |
| -----                  | -----    | Mn(3)-N(9)       | 2.394(7) | O(7)-Mn(1)       | 2.009(3)   |
| -----                  | -----    | -----            | -----    | O(7)-Mn(4)       | 2.120(3)   |
| -----                  | -----    | -----            | -----    | O(9)-Mn(4)       | 2.253(5)   |
| <b>Bond Angles (°)</b> |          |                  |          |                  |            |
| O(7)-Mn(1)-N(2)        | 172.5(2) | O(7)-Mn(1)-N(2)  | 178.4(3) | O(7)-Mn(1)-N(10) | 107.05(15) |
| O(7)-Mn(1)-N(3)        | 111.6(2) | O(7)-Mn(1)-N(3)  | 102.0(3) | O(7)-Mn(1)-N(2)  | 141.97(15) |
| N(2)-Mn(1)-N(3)        | 74.0(2)  | N(2)-Mn(1)-N(3)  | 77.2(3)  | N(10)-Mn(1)-N(2) | 109.62(16) |
| O(7)-Mn(1)-N(1)        | 100.8(2) | O(7)-Mn(1)-N(1)  | 102.8(3) | O(7)-Mn(1)-N(3)  | 95.68(14)  |
| N(2)-Mn(1)-N(1)        | 73.6(2)  | N(2)-Mn(1)-N(1)  | 78.0(3)  | N(10)-Mn(1)-N(3) | 94.71(16)  |
| N(3)-Mn(1)-N(1)        | 147.5(2) | N(3)-Mn(1)-N(1)  | 155.2(3) | N(2)-Mn(1)-N(3)  | 71.81(15)  |
| O(7)-Mn(1)-N(10)       | 90.0(2)  | O(7)-Mn(1)-N(14) | 93.0(2)  | O(7)-Mn(1)-N(1)  | 105.62(14) |
| N(2)-Mn(1)-N(10)       | 95.1(2)  | N(2)-Mn(1)-N(14) | 88.4(3)  | N(10)-Mn(1)-N(1) | 107.91(16) |
| N(3)-Mn(1)-N(10)       | 88.9(2)  | N(3)-Mn(1)-N(14) | 88.9(2)  | N(2)-Mn(1)-N(1)  | 72.20(15)  |
| N(1)-Mn(1)-N(10)       | 91.2(2)  | N(1)-Mn(1)-N(14) | 89.7(2)  | N(3)-Mn(1)-N(1)  | 142.21(16) |
| O(7)-Mn(1)-N(15)       | 86.9(2)  | O(7)-Mn(1)-N(10) | 91.7(2)  | O(7)-Mn(2)-N(7)  | 152.43(15) |
| N(2)-Mn(1)-N(15)       | 88.5(2)  | N(2)-Mn(1)-N(10) | 86.9(3)  | O(7)-Mn(2)-N(15) | 109.33(15) |
| N(3)-Mn(1)-N(15)       | 88.0(2)  | N(3)-Mn(1)-N(10) | 87.0(2)  | N(7)-Mn(2)-N(15) | 97.33(16)  |

|                   |          |                   |          |                   |            |
|-------------------|----------|-------------------|----------|-------------------|------------|
| N(1)-Mn(1)-N(15)  | 93.9(2)  | N(1)-Mn(1)-N(10)  | 92.4(2)  | O(7)-Mn(2)-N(6)   | 107.12(14) |
| N(10)-Mn(1)-N(15) | 174.5(2) | N(14)-Mn(1)-N(10) | 174.3(2) | N(7)-Mn(2)-N(6)   | 73.61(15)  |
| O(7)-Mn(2)-N(7)   | 175.4(3) | O(7)-Mn(2)-N(7)   | 176.5(2) | N(15)-Mn(2)-N(6)  | 100.54(16) |
| O(7)-Mn(2)-N(8)   | 107.1(2) | O(7)-Mn(2)-N(8)   | 110.0(2) | O(7)-Mn(2)-N(8)   | 97.35(14)  |
| N(7)-Mn(2)-N(8)   | 73.7(2)  | N(7)-Mn(2)-N(8)   | 73.3(2)  | N(7)-Mn(2)-N(8)   | 71.20(16)  |
| O(7)-Mn(2)-N(6)   | 104.4(2) | O(7)-Mn(2)-N(6)   | 102.8(2) | N(15)-Mn(2)-N(8)  | 98.47(16)  |
| N(7)-Mn(2)-N(6)   | 74.8(2)  | N(7)-Mn(2)-N(6)   | 73.8(2)  | N(6)-Mn(2)-N(8)   | 141.70(15) |
| N(8)-Mn(2)-N(6)   | 148.4(2) | N(8)-Mn(2)-N(6)   | 147.2(2) | O(7)-Mn(3)-N(5)   | 108.08(14) |
| O(7)-Mn(2)-N(4)   | 93.2(2)  | O(7)-Mn(2)-N(4)   | 88.1(2)  | O(7)-Mn(3)-N(12)  | 145.83(15) |
| N(7)-Mn(2)-N(4)   | 91.2(2)  | N(7)-Mn(2)-N(4)   | 91.3(2)  | N(5)-Mn(3)-N(12)  | 105.97(15) |
| N(8)-Mn(2)-N(4)   | 95.3(2)  | N(8)-Mn(2)-N(4)   | 87.1(2)  | O(7)-Mn(3)-N(13)  | 97.77(14)  |
| N(6)-Mn(2)-N(4)   | 84.6(2)  | N(6)-Mn(2)-N(4)   | 94.2(2)  | N(5)-Mn(3)-N(13)  | 102.45(16) |
| O(7)-Mn(2)-N(14)  | 87.1(3)  | O(7)-Mn(2)-N(15)  | 93.0(2)  | N(12)-Mn(3)-N(13) | 71.91(15)  |
| N(7)-Mn(2)-N(14)  | 88.5(2)  | N(7)-Mn(2)-N(15)  | 88.1(2)  | O(7)-Mn(3)-N(11)  | 104.72(14) |
| N(8)-Mn(2)-N(14)  | 83.6(2)  | N(8)-Mn(2)-N(15)  | 83.7(2)  | N(5)-Mn(3)-N(11)  | 99.01(16)  |
| N(6)-Mn(2)-N(14)  | 96.4(2)  | N(6)-Mn(2)-N(15)  | 94.6(2)  | N(12)-Mn(3)-N(11) | 72.39(15)  |
| N(4)-Mn(2)-N(14)  | 178.9(2) | N(4)-Mn(2)-N(15)  | 170.6(2) | N(13)-Mn(3)-N(11) | 142.15(15) |
| O(7)-Mn(3)-N(12)  | 164.2(3) | O(7)-Mn(3)-N(12)  | 173.6(2) | O(7)-Mn(4)-N(9)   | 91.19(14)  |
| O(7)-Mn(3)-N(13)  | 104.4(3) | O(7)-Mn(3)-N(11)  | 112.5(2) | O(7)-Mn(4)-N(14)  | 92.38(14)  |
| N(12)-Mn(3)-N(13) | 73.3(2)  | N(12)-Mn(3)-N(11) | 73.2(3)  | N(9)-Mn(4)-N(14)  | 112.66(16) |
| O(7)-Mn(3)-N(11)  | 105.9(2) | O(7)-Mn(3)-N(13)  | 101.7(2) | O(7)-Mn(4)-N(4)   | 90.21(15)  |
| N(12)-Mn(3)-N(11) | 74.0(2)  | N(12)-Mn(3)-N(13) | 72.5(3)  | N(9)-Mn(4)-N(4)   | 122.08(16) |
| N(13)-Mn(3)-N(11) | 147.0(2) | N(11)-Mn(3)-N(13) | 145.7(2) | N(14)-Mn(4)-N(4)  | 125.12(16) |
| O(7)-Mn(3)-N(9)   | 94.9(3)  | O(7)-Mn(3)-N(5)   | 86.9(2)  | O(7)-Mn(4)-O(9)   | 174.53(16) |
| N(12)-Mn(3)-N(9)  | 100.8(2) | N(12)-Mn(3)-N(5)  | 90.3(2)  | N(9)-Mn(4)-O(9)   | 92.69(18)  |
| N(13)-Mn(3)-N(9)  | 93.6(2)  | N(11)-Mn(3)-N(5)  | 89.8(2)  | N(14)-Mn(4)-O(9)  | 89.69(18)  |
| N(11)-Mn(3)-N(9)  | 96.4(2)  | N(13)-Mn(3)-N(5)  | 90.4(2)  | N(4)-Mn(4)-O(9)   | 84.46(18)  |
| -----             | -----    | O(7)-Mn(3)-N(9)   | 91.3(2)  | -----             | -----      |
| -----             | -----    | N(12)-Mn(3)-N(9)  | 91.6(2)  | -----             | -----      |
| -----             | -----    | N(11)-Mn(3)-N(9)  | 89.2(2)  | -----             | -----      |
| -----             | -----    | N(13)-Mn(3)-N(9)  | 91.7(2)  | -----             | -----      |
| -----             | -----    | N(5)-Mn(3)-N(9)   | 177.5(2) | -----             | -----      |
| Mn(2)-O(7)-Mn(3)  | 118.9(3) | Mn(1)-O(7)-Mn(2)  | 124.8(3) | Mn(2)-O(7)-Mn(3)  | 110.79(15) |
| Mn(2)-O(7)-Mn(1)  | 116.3(3) | Mn(1)-O(7)-Mn(3)  | 123.8(3) | Mn(2)-O(7)-Mn(1)  | 113.98(15) |
| Mn(3)-O(7)-Mn(1)  | 122.8(3) | Mn(2)-O(7)-Mn(3)  | 111.4(3) | Mn(3)-O(7)-Mn(1)  | 111.20(15) |
| -----             | -----    | -----             | -----    | Mn(2)-O(7)-Mn(4)  | 104.96(14) |

|       |       |       |       |                  |            |
|-------|-------|-------|-------|------------------|------------|
| ----- | ----- | ----- | ----- | Mn(3)-O(7)-Mn(4) | 109.05(15) |
| ----- | ----- | ----- | ----- | Mn(1)-O(7)-Mn(4) | 106.48(15) |
